# Supplementary material for: Tubular CPT1A deletion minimally affects aging and chronic kidney injury
Source: JCI Insight. 2024 Mar 22;9(6):e171961. doi: 10.1172/jci.insight.171961 (PMC11063933; doi:10.1172/jci.insight.171961)
Supplement: Supplemental data [file jciinsight-9-171961-s286.pdf]

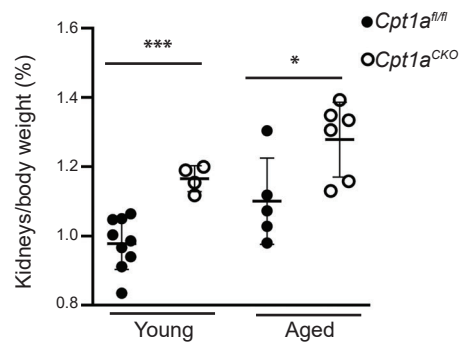

Supplemental Figure S1. Supplemental Figure S1. *Cpt1a*CKO mice have larger kidneys. Kidney weights expressed as a percentage of body weight in young and aged *Cpt1a*<sup>fl/fl</sup> and *Cpt1a*CKO mice. Means are shown  $\pm$  SD with \* =  $p < 0.05$  and \*\* =  $p < 0.01$ .

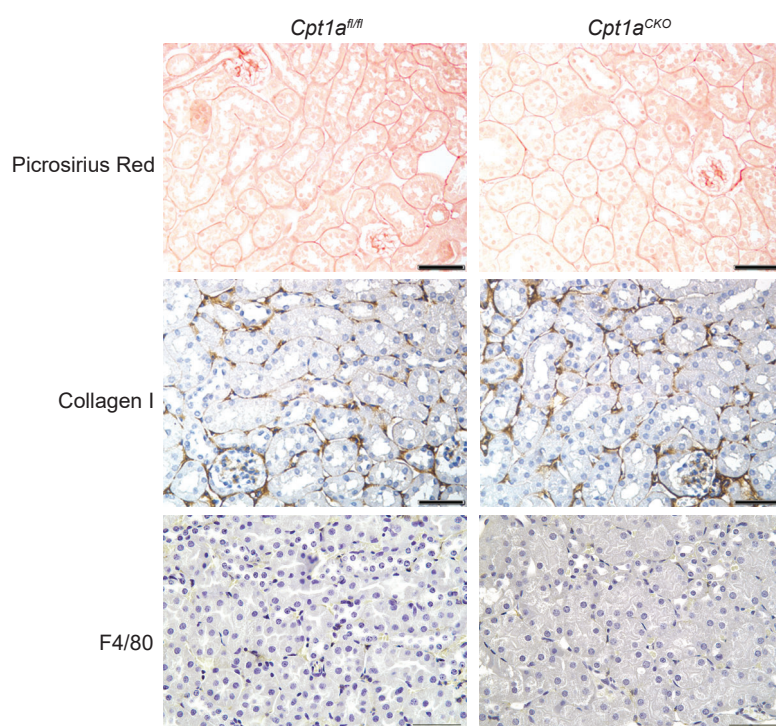

Supplemental Figure S2. Supplemental Figure S2. No difference in fibrosis or inflammation in young *Cpt1a<sup>CKO</sup>* mice compared to floxed controls. Picrosirius Red staining, IHC of collagen I and F4/80 on kidney tissue of young *Cpt1a<sup>fl/m</sup>* and *Cpt1a<sup>CKO</sup>* mice. Scale bars = 50μM.

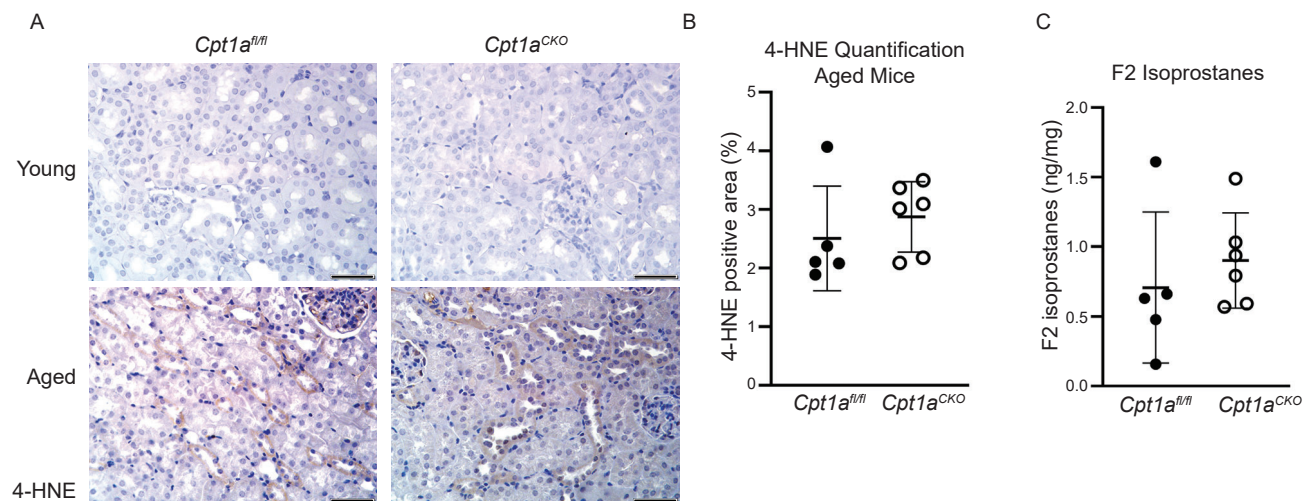

Supplemental Figure S3. No difference in 4-HNE or F2 isoprostanes between genotypes. 4-HNE staining was done on aged kidney tissues and quantified using ImageJ (A, B). Urine F2 isoprostanes were measured from aged mice and reported normalized to creatinine (C). Scale bars = 50 $\mu$ M.

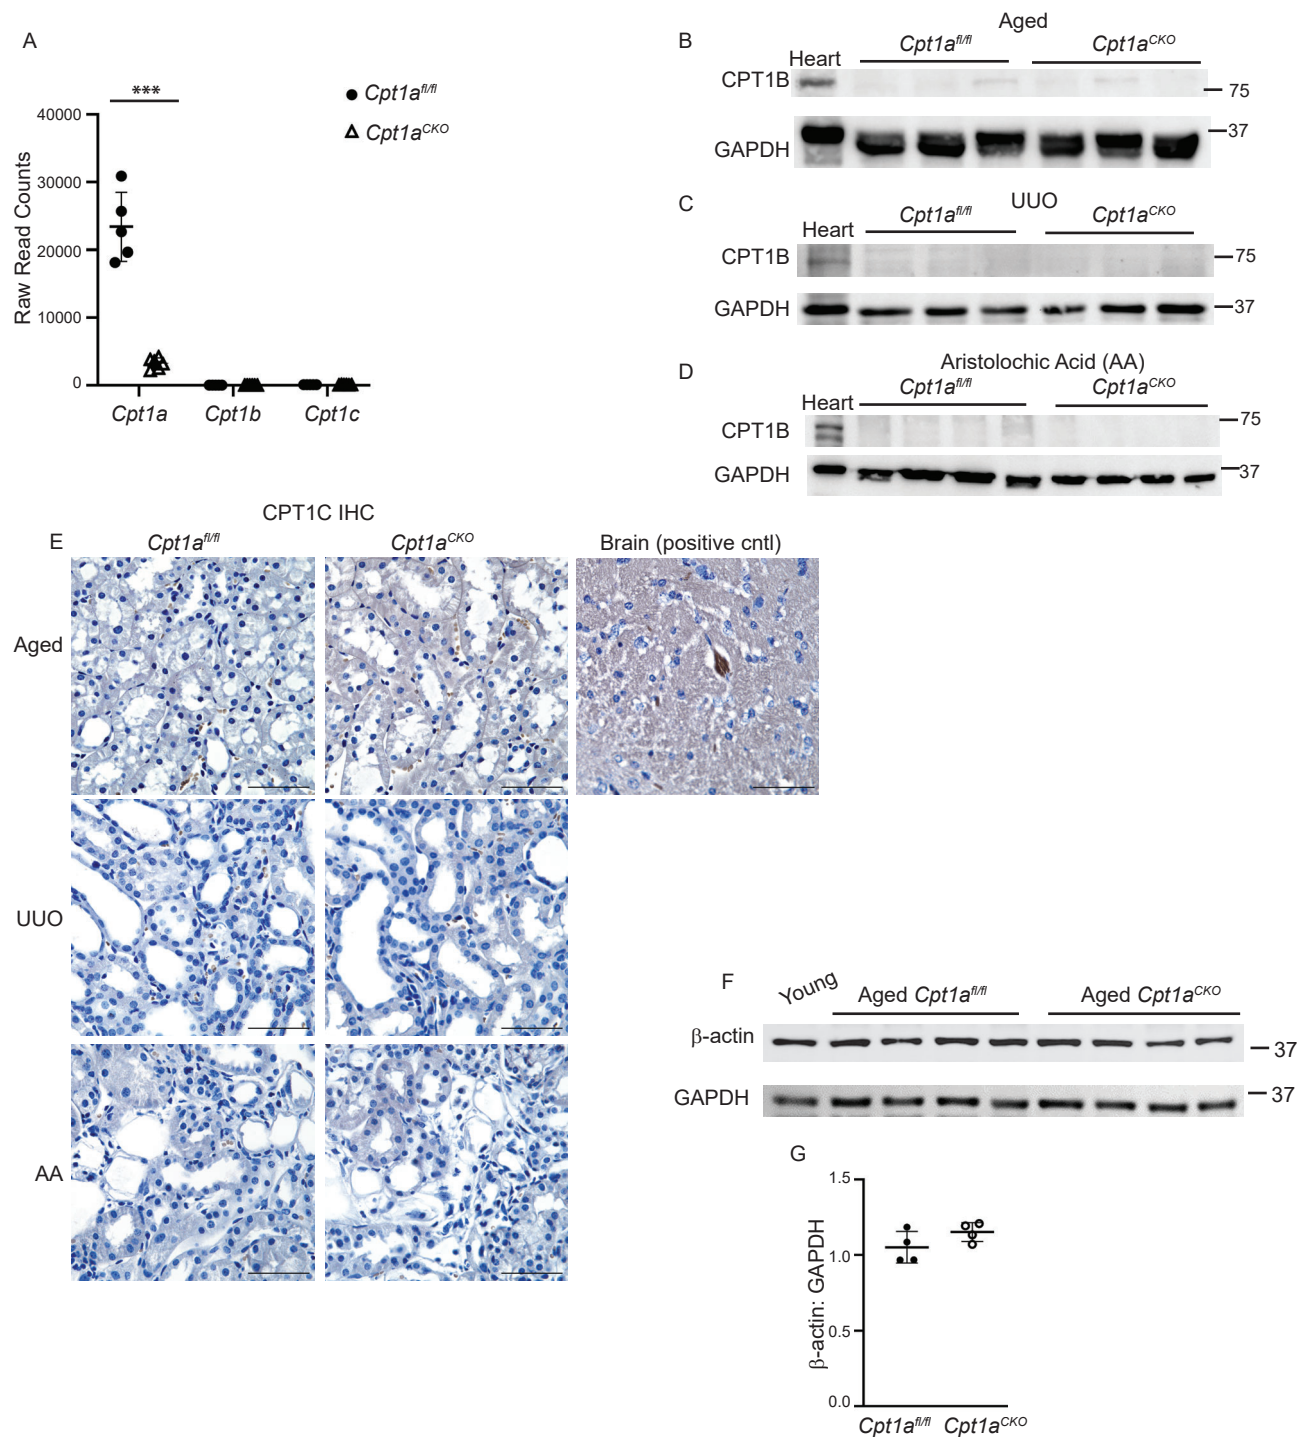

Supplemental Figure 4. Supplemental Figure S4. *Cpt1a<sup>CKO</sup>* kidneys do not have compensatory upregulation of *Cpt1b* and *Cpt1c*. (A) Transcript levels of *Cpt1a*, *Cpt1b*, and *Cpt1c* from RNAseq are shown for each genotype. There was only a statistical difference between genotypes in *Cpt1a* levels, means  $\pm$  SD shown, with p value calculated using the DESeq2 package. Immunoblots for CPT1B on kidney tissue lysates from aged (B), UUO-injured (C) or AAN-injured (D) mice with heart as a positive control. (E) Immunohistochemistry for CPT1C with brain as positive control. As heart does not express  $\beta$ -actin, we used GAPDH for loading control and show that GAPDH and  $\beta$ -actin have no significant differences as loading controls when CPT1A is deleted (F, G).

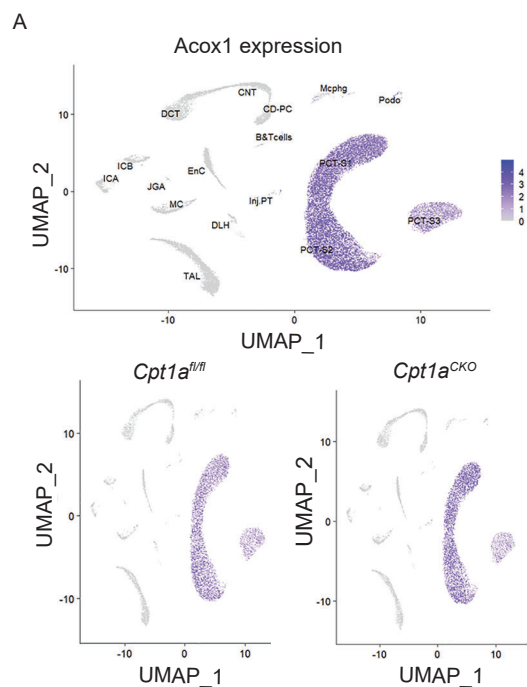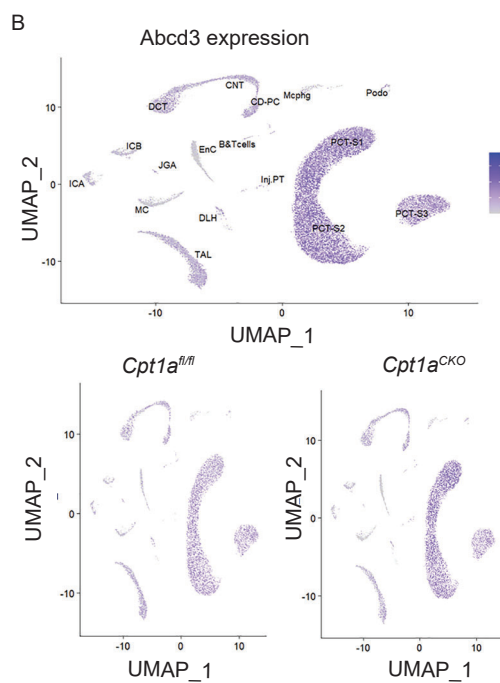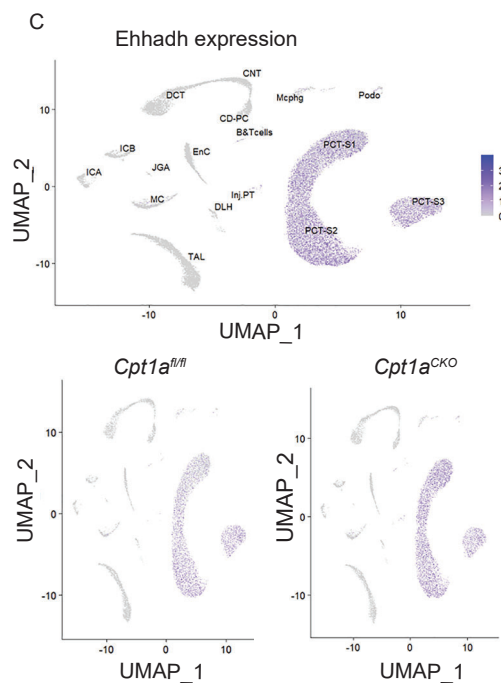

Supplemental Figure S5. UMAP dimension plots of peroxisomal genes that were significantly upregulated in *Cpt1a*<sup>CKO</sup> mice. Expression of *Acox1* (A), *Abcd3* (B), and *Ehhadh* (C) in different clusters from single nuclear RNA-seq shows proximal tubule-specific enrichment and increased expression in *Cpt1a*<sup>CKO</sup> versus *Cpt1a*<sup>fl/fl</sup> kidneys.

**Table. List of primers used in the study**

| <b>Gene name</b> | <b>Forward</b>                | <b>Reverse</b>                |
|------------------|-------------------------------|-------------------------------|
| Acox1            | 5'-AGGGAATTTGGCATCGCAGA-3'    | 5'-CATGCCCAAGTGAAGGTCCA-3'    |
| Actin            | 5'-GGGATGTTTGCTCCAACCAA-3'    | 5'-GCGCTTTTGACTCAGGATTTAA-3'  |
| aSMA             | 5'-CAGGGAGTAATGGTTGGAAT-3'    | 5'-TCTCAAACATAATCTGGGTCA-3'   |
| Col1a2           | 5'-GGAGGGAACGGTCCACGAT-3'     | 5'-GAGTCCGCGTATCCACAA-3'      |
| D17 del          | 5'-GAACCAAACCTGAACGCCTAAAC-3' | 5'-TGGGCTTTTGGTAGTCATAGGT-3'  |
| FABP1            | 5'-ATGAAGGCAATAGGTCTGCCC-3'   | 5'-CGATTTCTGACACCCCCTTGA3'    |
| GAPDH            | 5'-AGGTCGGTGTGAACGATTG-3'     | 5'-TGTAGACCATGTAGTTGAGGTCA-3' |
| Havcr1 (Kim-1)   | 5'-AAACCAGAGATTCCCACACG-3'    | 5'-GTCGTGGGTCTTCCTGTAGC-3'    |
| Hmgcs2           | 5'-CAGTGGAAGCAAGCTGGAAAC-3'   | 5'-TCTTGCAAAAGGGTGTGTGG-3'    |
| IL1b             | 5'-CCCAAAAGATGAAGGGCTGC-3'    | 5'-TGATGTGCTGCTGCGAGATT-3'    |
| IL6              | 5'-CTCTGCAAGAGACTTCATCCA-3'   | 5'-AGTCTCCTCTCCGGACTTGT-3'    |
| mtND1            | 5'-TAGAACGCAAAATCTTAGGG-3'    | 5'-TGCTAGTGTGAGTGATAGGG-3'    |
| PKD4             | 5'-GCTGCTGGACTTTGGTTCAGA-3'   | 5'-GGATATTGGCCAGGCGGAC-3'     |
